# Supplementary material
Source: PubMed Central journal article supplement (PMC10461534)
Supplement: gbad084_suppl_supplementary_materials.pdf [file gbad084_suppl_supplementary_materials.pdf]

# Educational Disparities in Hypertension Prevalence and Blood Pressure Percentiles in the Health and Retirement Study

## SUPPLEMENTARY TABLES AND FIGURES

**Table 1.** *Additional weighted descriptive statistics*

**Table 2.** *Coefficients and standard errors from UQR models of the 1<sup>st</sup> through 5<sup>th</sup> percentiles of systolic BP*

**Table 3.** *Coefficients and standard errors from UQR models of the 95<sup>th</sup> through 99<sup>th</sup> percentiles of systolic BP*

**Table 4.** *Coefficients and standard errors from OLS linear regression and UQR models of systolic BP, among those with diagnosed hypertension*

**Table 5.** *Coefficients and standard errors from OLS linear regression and UQR models of systolic BP, among those without diagnosed hypertension*

**Table 6.** *Coefficients and standard errors from OLS linear regression and UQR models of systolic BP, among those with diagnosed, treated hypertension and uncontrolled BP*

**Table 7.** *Coefficients and standard errors from OLS linear regression and UQR models of systolic BP, among those with diagnosed, treated hypertension and controlled BP*

**Table 8.** *Coefficients and standard errors from OLS linear regression and UQR models of systolic BP, adjusting for potential early-life confounders*

**Table 9.** *Coefficients and standard errors from OLS linear regression and UQR models of systolic BP, adjusting for potential early-life confounders and adult socioeconomic and health-related covariates*

**Table 10.** *Coefficients and standard errors from OLS linear regression and UQR models of diastolic BP*

**Table 11.** *Coefficients and standard errors from OLS linear regression and UQR models of systolic BP, measuring education with years of schooling*

**Table 12.** *Coefficients and standard errors from OLS linear regression and UQR models of systolic BP, among those aged 51-69*

**Figure 1.** *Kernel density plots of systolic BP by education*

**Table 1.** *Additional weighted descriptive statistics*

|                    | Overall        | By education          |                    |                             |                      |
|--------------------|----------------|-----------------------|--------------------|-----------------------------|----------------------|
|                    | Mean (SD) or % | Less than high school | High school or GED | Associate's or some college | Bachelor's or higher |
| Childhood SES      |                |                       |                    |                             |                      |
| Poor               | 26.16          | 48.17                 | 28.63              | 24.05                       | 16.54                |
| About average      | 64.58          | 47.34                 | 66.12              | 65.72                       | 68.90                |
| Well off           | 9.26           | 4.49                  | 5.25               | 10.23                       | 14.55                |
| Mother's education |                |                       |                    |                             |                      |
| Up to 8 years      | 24.15          | 52.22                 | 29.03              | 18.22                       | 12.98                |
| 9-11 years         | 11.14          | 10.31                 | 15.12              | 11.30                       | 7.14                 |
| 12 years           | 38.44          | 15.39                 | 40.51              | 45.33                       | 39.43                |
| More than 12 years | 18.67          | 1.70                  | 5.71               | 20.15                       | 37.84                |
| Unknown            | 7.60           | 20.38                 | 9.63               | 5.00                        | 2.62                 |
| Childhood health   |                |                       |                    |                             |                      |
| Poor/Fair          | 5.99           | 12.47                 | 5.19               | 6.87                        | 3.44                 |
| Good               | 13.73          | 24.33                 | 14.79              | 12.40                       | 9.51                 |
| Very good          | 24.23          | 23.16                 | 25.25              | 25.39                       | 22.55                |
| Excellent          | 56.05          | 40.04                 | 54.77              | 55.34                       | 64.50                |
| Region of birth    |                |                       |                    |                             |                      |
| Northeast          | 20.64          | 9.85                  | 19.66              | 21.31                       | 25.43                |
| Midwest            | 29.13          | 14.22                 | 34.29              | 29.49                       | 29.40                |
| South              | 28.20          | 35.63                 | 29.04              | 28.13                       | 24.38                |
| West               | 8.85           | 5.96                  | 7.48               | 11.43                       | 9.16                 |
| Outside U.S.       | 13.18          | 34.34                 | 9.52               | 9.64                        | 11.63                |
| Marital status     |                |                       |                    |                             |                      |

|                                         |              |              |              |              |              |
|-----------------------------------------|--------------|--------------|--------------|--------------|--------------|
| Married/Partnered                       | 66.80        | 57.07        | 63.68        | 66.82        | 74.00        |
| Divorced/Separated                      | 15.24        | 16.21        | 15.60        | 17.53        | 12.44        |
| Widowed                                 | 11.33        | 19.41        | 14.73        | 9.09         | 6.49         |
| Never married                           | 6.62         | 7.31         | 5.99         | 6.55         | 7.07         |
| Total wealth quintile                   |              |              |              |              |              |
| Q1: Up to \$7,000                       | 15.71        | 38.77        | 17.72        | 14.07        | 5.75         |
| Q2: \$7,001 – 85,600                    | 17.93        | 26.80        | 22.04        | 18.44        | 9.57         |
| Q3: \$85,601 – 226,000                  | 19.67        | 20.84        | 24.42        | 21.04        | 12.99        |
| Q4: \$226,001 – 598,900                 | 21.73        | 8.44         | 20.68        | 24.46        | 25.75        |
| Q5: More than \$598,900                 | 24.96        | 5.15         | 15.14        | 21.99        | 45.93        |
| Body mass index (BMI)                   | 30.20 (6.43) | 30.24 (7.50) | 30.77 (6.86) | 30.50 (6.43) | 29.32 (5.40) |
| Frequency of vigorous physical activity |              |              |              |              |              |
| Never                                   | 50.44        | 65.27        | 59.00        | 49.83        | 35.98        |
| Monthly or weekly                       | 22.26        | 18.83        | 21.25        | 23.42        | 23.67        |
| More than once per week                 | 27.30        | 15.90        | 19.75        | 26.75        | 40.34        |
| Number of alcoholic drinks per week     | 2.91 (5.14)  | 2.08 (5.91)  | 2.61 (5.29)  | 2.89 (4.88)  | 3.58 (4.74)  |
| Smoking history                         |              |              |              |              |              |
| Never smoked                            | 45.07        | 37.61        | 40.57        | 40.68        | 56.75        |
| Formerly smoked                         | 40.85        | 38.31        | 42.93        | 43.80        | 37.04        |
| Currently smokes                        | 14.08        | 24.07        | 16.50        | 15.51        | 6.21         |
| Diabetes                                | 23.63        | 35.91        | 25.71        | 22.57        | 17.44        |
| Heart disease                           | 22.69        | 27.59        | 25.71        | 22.23        | 17.94        |
| Stroke                                  | 7.05         | 11.23        | 8.06         | 6.96         | 4.36         |
| Health insurance                        |              |              |              |              |              |
| Private                                 | 60.43        | 28.02        | 55.79        | 63.14        | 75.99        |
| Public                                  | 33.97        | 61.14        | 38.04        | 31.17        | 21.21        |

|                                 |       |       |       |       |       |
|---------------------------------|-------|-------|-------|-------|-------|
| None                            | 5.60  | 10.84 | 6.16  | 5.70  | 2.80  |
| Doctor visits in past two years |       |       |       |       |       |
| 0                               | 7.69  | 18.66 | 7.79  | 6.21  | 4.47  |
| 1-5                             | 38.69 | 34.13 | 39.00 | 40.52 | 38.57 |
| 6-11                            | 28.18 | 22.29 | 28.09 | 27.45 | 31.32 |
| 12-23                           | 16.26 | 14.92 | 16.40 | 16.16 | 16.75 |
| 24 or more                      | 9.18  | 10.00 | 8.73  | 9.66  | 8.89  |

---

*Note.* N=13,965.

**Table 2.** Coefficients and standard errors from UQR models of the 1<sup>st</sup> through 5<sup>th</sup> percentiles of systolic BP

|                             | 1 <sup>st</sup> percentile | 2 <sup>nd</sup> percentile | 3 <sup>rd</sup> percentile | 4 <sup>th</sup> percentile | 5 <sup>th</sup> percentile |
|-----------------------------|----------------------------|----------------------------|----------------------------|----------------------------|----------------------------|
| Education                   |                            |                            |                            |                            |                            |
| Less than high school       | Ref.                       | Ref.                       | Ref.                       | Ref.                       | Ref.                       |
| High school or GED          | 0.45 (1.16)                | -0.34 (0.83)               | -0.19 (0.70)               | -1.21 (0.71)               | -0.99 (0.73)               |
| Associate's or some college | 0.27 (1.43)                | -1.11 (1.04)               | -1.56 (0.75) *             | -2.13 (0.63) **            | -2.26 (0.80) **            |
| Bachelor's or higher        | -0.10 (1.38)               | -0.88 (1.22)               | -1.94 (0.97) *             | -3.49 (0.87) ***           | -2.91 (0.85) **            |
| Age                         | 0.13 (0.21)                | 0.41 (0.21)                | 0.49 (0.17) **             | 0.44 (0.15) **             | 0.50 (0.13) ***            |
| Age-squared                 | -0.00 (0.01)               | -0.01 (0.01)               | -0.01 (0.00) *             | -0.01 (0.00) *             | -0.01 (0.00) **            |
| Female                      | -5.36 (0.98) ***           | -5.89 (0.88) ***           | -5.84 (0.75) ***           | -6.03 (0.72) ***           | -6.62 (0.67) ***           |
| Race/ethnicity              |                            |                            |                            |                            |                            |
| Non-Hispanic White          | Ref.                       | Ref.                       | Ref.                       | Ref.                       | Ref.                       |
| Non-Hispanic Black          | 2.90 (1.23) *              | 3.23 (0.89) **             | 2.83 (0.75) ***            | 2.84 (0.66) ***            | 3.60 (0.60) ***            |
| Hispanic                    | 1.61 (1.12)                | 1.24 (1.07)                | 0.98 (0.94)                | -0.14 (1.08)               | 0.51 (1.01)                |
| Other                       | -3.10 (3.24)               | -3.19 (2.90)               | -4.47 (3.07)               | -4.92 (2.71)               | -4.26 (2.40)               |
| Constant                    | 91.24 (2.09) ***           | 94.35 (1.80) ***           | 96.86 (1.25) ***           | 99.99 (1.16) ***           | 100.79 (1.13) ***          |
| Systolic BP at percentile   | 90.33                      | 94.00                      | 96.67                      | 98.33                      | 100.00                     |

*Note.* N=14,498. Standard errors in parentheses. Age is centered at 51 years. BP=Blood pressure, measured in millimeters of mercury (mmHg); Ref=Reference; UQR=Unconditional quantile regression. Two-sided significance tests: \*\*\*  $P < .001$ ; \*\*  $P < .01$ ; \*  $P < .05$

**Table 3.** Coefficients and standard errors from UQR models of the 95<sup>th</sup> through 99<sup>th</sup> percentiles of systolic BP

|                             | 95 <sup>th</sup> percentile | 96 <sup>th</sup> percentile | 97 <sup>th</sup> percentile | 98 <sup>th</sup> percentile | 99 <sup>th</sup> percentile |
|-----------------------------|-----------------------------|-----------------------------|-----------------------------|-----------------------------|-----------------------------|
| Education                   |                             |                             |                             |                             |                             |
| Less than high school       | Ref.                        | Ref.                        | Ref.                        | Ref.                        | Ref.                        |
| High school or GED          | -5.71 (2.02) **             | -5.85 (2.22) *              | -4.01 (2.57)                | -7.91 (3.63) *              | -8.14 (5.96)                |
| Associate's or some college | -9.18 (2.05) ***            | -9.72 (2.26) ***            | -8.04 (2.47) **             | -15.11 (3.51) ***           | -14.38 (5.18) **            |
| Bachelor's or higher        | -12.29 (1.71) ***           | -12.77 (2.05) ***           | -11.88 (2.46) ***           | -18.55 (3.46) ***           | -18.34 (4.95) ***           |
| Age                         | -0.11 (0.19)                | -0.19 (0.19)                | -0.37 (0.25)                | -0.22 (0.35)                | -0.55 (0.50)                |
| Age-squared                 | 0.01 (0.01) *               | 0.02 (0.01) **              | 0.02 (0.01) **              | 0.02 (0.01) *               | 0.03 (0.02) *               |
| Female                      | -2.97 (0.92) **             | -2.40 (0.90) **             | -2.47 (1.06) *              | -1.64 (1.33)                | -2.52 (2.01)                |
| Race/ethnicity              |                             |                             |                             |                             |                             |
| Non-Hispanic White          | Ref.                        | Ref.                        | Ref.                        | Ref.                        | Ref.                        |
| Non-Hispanic Black          | 9.52 (1.52) ***             | 8.77 (1.61) ***             | 9.32 (2.02) ***             | 8.58 (2.76) **              | 6.78 (3.83)                 |
| Hispanic                    | 0.84 (2.08)                 | 0.95 (2.09)                 | 2.55 (2.68)                 | -0.23 (2.88)                | 0.31 (4.67)                 |
| Other                       | 4.30 (2.47)                 | 4.54 (2.90)                 | 3.84 (3.39)                 | 5.42 (4.22)                 | 4.37 (6.42)                 |
| Constant                    | 167.21 (2.46) ***           | 169.63 (2.44) ***           | 172.91 (2.71) ***           | 181.72 (4.18) ***           | 193.21 (6.08) ***           |
| Systolic BP at percentile   | 161.33                      | 164.00                      | 167.33                      | 173.00                      | 182.50                      |

*Note.* N=14,498. Standard errors in parentheses. Age is centered at 51 years. BP=Blood pressure, measured in millimeters of mercury (mmHg); Ref=Reference; UQR=Unconditional quantile regression. Two-sided significance tests: \*\*\*  $P < .001$ ; \*\*  $P < .01$ ; \*  $P < .05$

**Table 4.** Coefficients and standard errors from OLS linear regression and UQR models of systolic BP, among those with diagnosed hypertension

|                             | OLS               | UQR                         |                             |                             |                             |                             |
|-----------------------------|-------------------|-----------------------------|-----------------------------|-----------------------------|-----------------------------|-----------------------------|
|                             | Mean              | 10 <sup>th</sup> percentile | 25 <sup>th</sup> percentile | 50 <sup>th</sup> percentile | 75 <sup>th</sup> percentile | 90 <sup>th</sup> percentile |
| <b>Education</b>            |                   |                             |                             |                             |                             |                             |
| Less than high school       | Ref.              | Ref.                        | Ref.                        | Ref.                        | Ref.                        | Ref.                        |
| High school or GED          | -1.86 (0.83) *    | -1.34 (1.06)                | -0.74 (0.89)                | -1.46 (0.92)                | -2.60 (1.12) *              | -3.68 (1.76) *              |
| Associate's or some college | -3.74 (0.80) ***  | -2.83 (0.95) **             | -2.42 (0.97) *              | -2.90 (0.88) **             | -4.61 (1.38) **             | -6.41 (1.97) **             |
| Bachelor's or higher        | -4.04 (0.95) ***  | -1.38 (1.06)                | -2.48 (1.08) *              | -3.70 (1.08) **             | -4.65 (1.36) **             | -8.61 (1.88) ***            |
| Age                         | -0.03 (0.12)      | 0.17 (0.14)                 | -0.01 (0.13)                | -0.05 (0.14)                | -0.01 (0.18)                | -0.15 (0.23)                |
| Age-squared                 | 0.01 (0.00)       | -0.00 (0.00)                | 0.00 (0.00)                 | 0.01 (0.00)                 | 0.01 (0.00)                 | 0.01 (0.01)                 |
| Female                      | -4.21 (0.44) ***  | -4.14 (0.68) ***            | -4.66 (0.60) ***            | -4.59 (0.57) ***            | -4.46 (0.78) ***            | -3.39 (1.13) **             |
| <b>Race/ethnicity</b>       |                   |                             |                             |                             |                             |                             |
| Non-Hispanic White          | Ref.              | Ref.                        | Ref.                        | Ref.                        | Ref.                        | Ref.                        |
| Non-Hispanic Black          | 2.94 (0.71) ***   | 0.02 (0.91)                 | 0.98 (0.82)                 | 2.12 (0.93) *               | 4.82 (1.06) ***             | 6.87 (1.20) ***             |
| Hispanic                    | 0.79 (0.82)       | -0.14 (1.06)                | 0.10 (0.83)                 | 0.45 (0.97)                 | 1.73 (1.09)                 | 3.33 (2.05)                 |
| Other                       | 4.36 (1.22) **    | 3.80 (1.28) **              | 3.17 (1.58) *               | 4.25 (1.39) **              | 5.39 (2.24) *               | 7.40 (2.65) **              |
| Constant                    | 134.50 (1.24) *** | 111.66 (1.31) ***           | 121.86 (1.56) ***           | 132.83 (1.54) ***           | 145.39 (2.03) ***           | 160.41 (2.80) ***           |
| Systolic BP at percentile   |                   | 109.33                      | 119.00                      | 130.00                      | 143.00                      | 156.67                      |

*Note.* N=8,917. Standard errors in parentheses. Age is centered at 51 years. BP=Blood pressure, measured in millimeters of mercury (mmHg); OLS=Ordinary least squares; Ref=Reference; UQR=Unconditional quantile regression. Two-sided significance tests: \*\*\*  $P < .001$ ; \*\*  $P < .01$ ; \*  $P < .05$

**Table 5.** Coefficients and standard errors from OLS linear regression and UQR models of systolic BP, among those without diagnosed hypertension

|                             | OLS               | UQR                         |                             |                             |                             |                             |
|-----------------------------|-------------------|-----------------------------|-----------------------------|-----------------------------|-----------------------------|-----------------------------|
|                             | Mean              | 10 <sup>th</sup> percentile | 25 <sup>th</sup> percentile | 50 <sup>th</sup> percentile | 75 <sup>th</sup> percentile | 90 <sup>th</sup> percentile |
| <b>Education</b>            |                   |                             |                             |                             |                             |                             |
| Less than high school       | Ref.              | Ref.                        | Ref.                        | Ref.                        | Ref.                        | Ref.                        |
| High school or GED          | -1.67 (1.01)      | -0.98 (1.01)                | -1.54 (1.03)                | 0.31 (1.23)                 | -0.44 (1.31)                | -3.57 (2.72)                |
| Associate's or some college | -2.78 (1.00) **   | -2.77 (1.13) *              | -1.58 (1.03)                | -0.53 (1.33)                | -1.89 (1.39)                | -6.50 (2.54) *              |
| Bachelor's or higher        | -5.12 (1.11) ***  | -3.68 (1.12) **             | -3.47 (1.15) **             | -3.13 (1.28) *              | -4.18 (1.34) **             | -8.94 (2.63) **             |
| Age                         | 0.44 (0.10) ***   | 0.45 (0.17) **              | 0.28 (0.14) *               | 0.57 (0.14) ***             | 0.64 (0.14) ***             | 0.49 (0.19) *               |
| Age-squared                 | -0.00 (0.00)      | -0.01 (0.00)                | -0.00 (0.00)                | -0.01 (0.00)                | -0.01 (0.00) *              | -0.00 (0.01)                |
| Female                      | -7.25 (0.52) ***  | -7.66 (0.81) ***            | -7.65 (0.61) ***            | -7.94 (0.65) ***            | -7.33 (0.81) ***            | -6.13 (1.24) ***            |
| <b>Race/ethnicity</b>       |                   |                             |                             |                             |                             |                             |
| Non-Hispanic White          | Ref.              | Ref.                        | Ref.                        | Ref.                        | Ref.                        | Ref.                        |
| Non-Hispanic Black          | 5.51 (1.05) ***   | 3.40 (0.77) ***             | 3.55 (0.93) ***             | 4.72 (1.14) ***             | 7.48 (1.41) ***             | 8.39 (2.91) **              |
| Hispanic                    | 1.09 (0.91)       | -0.45 (1.19)                | 0.04 (0.99)                 | 1.49 (1.04)                 | 1.90 (1.16)                 | 1.00 (2.02)                 |
| Other                       | -1.24 (1.54)      | -3.18 (2.39)                | -1.65 (1.75)                | 0.07 (1.84)                 | 0.15 (2.12)                 | 1.49 (2.64)                 |
| Constant                    | 124.90 (1.21) *** | 104.95 (1.41) ***           | 114.48 (1.39) ***           | 121.01 (1.74) ***           | 132.67 (1.81) ***           | 148.02 (2.78) ***           |
| Systolic BP at percentile   |                   | 102.00                      | 111.00                      | 121.00                      | 132.67                      | 144.67                      |

*Note.* N=5,581. Standard errors in parentheses. Age is centered at 51 years. BP=Blood pressure, measured in millimeters of mercury (mmHg); OLS=Ordinary least squares; Ref=Reference; UQR=Unconditional quantile regression. Two-sided significance tests: \*\*\*  $P < .001$ ; \*\*  $P < .01$ ; \*  $P < .05$



**Table 6.** Coefficients and standard errors from OLS linear regression and UQR models of systolic BP, among those with diagnosed, treated hypertension and uncontrolled BP

|                             | OLS               | UQR                         |                             |                             |                             |                             |
|-----------------------------|-------------------|-----------------------------|-----------------------------|-----------------------------|-----------------------------|-----------------------------|
|                             | Mean              | 10 <sup>th</sup> percentile | 25 <sup>th</sup> percentile | 50 <sup>th</sup> percentile | 75 <sup>th</sup> percentile | 90 <sup>th</sup> percentile |
| <b>Education</b>            |                   |                             |                             |                             |                             |                             |
| Less than high school       | Ref.              | Ref.                        | Ref.                        | Ref.                        | Ref.                        | Ref.                        |
| High school or GED          | -0.14 (0.89)      | -0.50 (0.99)                | 0.29 (0.57)                 | -0.40 (0.84)                | -0.46 (1.50)                | 0.25 (2.69)                 |
| Associate's or some college | -2.26 (0.90) *    | -2.15 (1.07) *              | -1.72 (0.83) *              | -2.44 (1.00) *              | -2.56 (1.60)                | -4.74 (2.78)                |
| Bachelor's or higher        | -4.11 (0.96) ***  | -2.70 (1.15) *              | -1.72 (0.82) *              | -4.20 (1.07) ***            | -5.60 (1.84) **             | -9.12 (2.33) ***            |
| Age                         | 0.34 (0.13) *     | 1.04 (0.21) ***             | 0.53 (0.11) ***             | 0.33 (0.14) *               | -0.06 (0.22)                | -0.42 (0.41)                |
| Age-squared                 | -0.00 (0.00)      | -0.02 (0.00) **             | -0.01 (0.00) **             | -0.00 (0.00)                | 0.01 (0.01)                 | 0.02 (0.01)                 |
| Female                      | -1.28 (0.76)      | -5.25 (0.97) ***            | -1.83 (0.66) **             | -0.52 (0.79)                | -0.55 (0.99)                | 1.07 (1.79)                 |
| <b>Race/ethnicity</b>       |                   |                             |                             |                             |                             |                             |
| Non-Hispanic White          | Ref.              | Ref.                        | Ref.                        | Ref.                        | Ref.                        | Ref.                        |
| Non-Hispanic Black          | 2.37 (0.77) **    | 2.27 (1.13) *               | 1.36 (0.68)                 | 2.01 (0.81) *               | 2.90 (1.22) *               | 2.47 (2.65)                 |
| Hispanic                    | 2.46 (0.96) *     | 2.29 (1.34)                 | 2.64 (0.72) ***             | 2.68 (1.16) *               | 2.57 (1.72)                 | 0.35 (3.1)                  |
| Other                       | 2.51 (1.55)       | 1.09 (2.47)                 | 1.21 (1.27)                 | 3.46 (1.65) *               | 2.44 (2.40)                 | 5.52 (5.32)                 |
| Constant                    | 147.91 (1.41) *** | 129.80 (2.07) ***           | 138.53 (1.16) ***           | 145.39 (1.58) ***           | 158.50 (2.56) ***           | 173.31 (4.15) ***           |
| Systolic BP at percentile   |                   | 137.67                      | 142.67                      | 148.67                      | 158.67                      | 170.67                      |

*Note.* N=2,720. Standard errors in parentheses. Age is centered at 51 years. BP=Blood pressure, measured in millimeters of mercury (mmHg); OLS=Ordinary least squares; Ref=Reference; UQR=Unconditional quantile regression. Two-sided significance tests: \*\*\*  $P < .001$ ; \*\*  $P < .01$ ; \*  $P < .05$

**Table 7.** Coefficients and standard errors from OLS linear regression and UQR models of systolic BP, among those with diagnosed, treated hypertension and controlled BP

|                             | OLS              | UQR                         |                             |                             |                             |                             |
|-----------------------------|------------------|-----------------------------|-----------------------------|-----------------------------|-----------------------------|-----------------------------|
|                             | Mean             | 10 <sup>th</sup> percentile | 25 <sup>th</sup> percentile | 50 <sup>th</sup> percentile | 75 <sup>th</sup> percentile | 90 <sup>th</sup> percentile |
| <b>Education</b>            |                  |                             |                             |                             |                             |                             |
| Less than high school       | Ref.             | Ref.                        | Ref.                        | Ref.                        | Ref.                        | Ref.                        |
| High school or GED          | -0.11 (0.71)     | -1.71 (1.29)                | -0.46 (1.11)                | 0.10 (0.96)                 | -0.05 (0.86)                | -0.12 (0.88)                |
| Associate's or some college | -0.94 (0.68)     | -2.82 (1.25) *              | -2.28 (1.15)                | -0.99 (1.04)                | -0.53 (0.85)                | -0.60 (0.87)                |
| Bachelor's or higher        | -0.18 (0.69)     | 0.35 (1.17)                 | -0.94 (1.26)                | -0.81 (0.92)                | -0.45 (0.83)                | -0.30 (0.77)                |
| Age                         | 0.26 (0.09) **   | 0.42 (0.20) *               | 0.32 (0.15) *               | 0.26 (0.11) *               | 0.24 (0.09) *               | 0.06 (0.11)                 |
| Age-squared                 | -0.00 (0.00) *   | -0.01 (0.01) *              | -0.01 (0.00)                | -0.00 (0.00)                | -0.00 (0.00)                | 0.00 (0.00)                 |
| Female                      | -2.78 (0.35) *** | -4.07 (0.81) ***            | -3.44 (0.65) ***            | -3.64 (0.47) ***            | -1.92 (0.45) ***            | -0.99 (0.43) *              |
| <b>Race/ethnicity</b>       |                  |                             |                             |                             |                             |                             |
| Non-Hispanic White          | Ref.             | Ref.                        | Ref.                        | Ref.                        | Ref.                        | Ref.                        |
| Non-Hispanic Black          | -0.13 (0.47)     | -0.25 (1.26)                | -0.26 (0.89)                | -0.33 (0.62)                | -0.32 (0.63)                | -0.03 (0.46)                |
| Hispanic                    | 0.08 (0.60)      | -0.93 (1.63)                | -0.43 (1.15)                | 0.03 (0.75)                 | 0.30 (0.80)                 | 0.37 (0.78)                 |
| Other                       | 1.42 (1.10)      | 0.98 (2.32)                 | 1.64 (1.66)                 | 1.71 (1.56)                 | 2.74 (1.52)                 | 1.12 (1.42)                 |
| Constant                    | 120.7 (0.93) *** | 106.64 (1.99) ***           | 113.98 (1.62) ***           | 122.72 (1.37) ***           | 128.84 (1.25) ***           | 135.21 (1.16) ***           |
| Systolic BP at percentile   |                  | 105.67                      | 114.00                      | 122.67                      | 130.00                      | 135.67                      |

*Note.* N=5,191. Standard errors in parentheses. Age is centered at 51 years. BP=Blood pressure, measured in millimeters of mercury (mmHg); OLS=Ordinary least squares; Ref=Reference; UQR=Unconditional quantile regression. Two-sided significance tests: \*\*\*  $P < .001$ ; \*\*  $P < .01$ ; \*  $P < .05$

**Table 8.** *Coefficients and standard errors from OLS linear regression and UQR models of systolic BP, adjusting for potential early-life confounders*

|                             | OLS              | UQR                         |                             |                             |                             |                             |
|-----------------------------|------------------|-----------------------------|-----------------------------|-----------------------------|-----------------------------|-----------------------------|
|                             | Mean             | 10 <sup>th</sup> percentile | 25 <sup>th</sup> percentile | 50 <sup>th</sup> percentile | 75 <sup>th</sup> percentile | 90 <sup>th</sup> percentile |
| <b>Education</b>            |                  |                             |                             |                             |                             |                             |
| Less than high school       | Ref.             | Ref.                        | Ref.                        | Ref.                        | Ref.                        | Ref.                        |
| High school or GED          | -2.14 (0.70) **  | -2.03 (0.70) **             | -1.91 (0.68) **             | -1.07 (0.73)                | -2.12 (1.08)                | -4.92 (1.68) **             |
| Associate's or some college | -3.82 (0.70) *** | -2.44 (0.81) **             | -3.00 (0.76) ***            | -2.55 (0.77) **             | -4.54 (1.10) ***            | -6.65 (1.69) ***            |
| Bachelor's or higher        | -5.77 (0.79) *** | -3.64 (0.94) ***            | -5.21 (0.93) ***            | -5.06 (0.91) ***            | -6.03 (1.16) ***            | -9.39 (1.57) ***            |
| Age                         | 0.34 (0.07) ***  | 0.49 (0.12) ***             | 0.44 (0.10) ***             | 0.39 (0.09) ***             | 0.39 (0.10) ***             | 0.12 (0.18)                 |
| Age-squared                 | -0.00 (0.00)     | -0.01 (0.00) *              | -0.01 (0.00) *              | -0.00 (0.00)                | 0.00 (0.00)                 | 0.01 (0.01)                 |
| Female                      | -5.94 (0.34) *** | -6.89 (0.54) ***            | -6.90 (0.48) ***            | -6.48 (0.40) ***            | -6.17 (0.51) ***            | -3.80 (0.82) ***            |
| <b>Race/ethnicity</b>       |                  |                             |                             |                             |                             |                             |
| Non-Hispanic White          | Ref.             | Ref.                        | Ref.                        | Ref.                        | Ref.                        | Ref.                        |
| Non-Hispanic Black          | 4.78 (0.69) ***  | 2.75 (0.71) ***             | 3.59 (0.69) ***             | 3.65 (0.84) ***             | 5.98 (1.08) ***             | 8.33 (1.32) ***             |
| Hispanic                    | 1.27 (0.73)      | -0.48 (1.12)                | 0.82 (0.83)                 | 0.71 (0.80)                 | 1.25 (0.97)                 | 2.32 (1.61)                 |
| Other                       | 2.08 (0.99) *    | -0.29 (1.53)                | 1.37 (1.15)                 | 1.74 (1.06)                 | 2.76 (1.47)                 | 4.98 (2.29) *               |
| <b>Childhood SES</b>        |                  |                             |                             |                             |                             |                             |
| Poor                        | Ref.             | Ref.                        | Ref.                        | Ref.                        | Ref.                        | Ref.                        |
| About average               | 0.10 (0.48)      | 0.76 (0.58)                 | 0.57 (0.51)                 | 0.49 (0.60)                 | -0.93 (0.72)                | 0.12 (1.10)                 |
| Well off                    | -0.12 (0.73)     | -2.02 (1.28)                | -0.13 (0.96)                | 0.66 (0.91)                 | -0.33 (1.02)                | 1.67 (1.83)                 |
| <b>Mother's education</b>   |                  |                             |                             |                             |                             |                             |
| Up to 8 years               | Ref.             | Ref.                        | Ref.                        | Ref.                        | Ref.                        | Ref.                        |
| 9-11 years                  | 0.64 (0.67)      | 0.23 (0.88)                 | 0.24 (0.72)                 | 0.20 (0.84)                 | 1.78 (1.09)                 | 0.79 (1.62)                 |
| 12 years                    | -0.31 (0.56)     | -0.80 (0.71)                | 0.07 (0.74)                 | -0.52 (0.62)                | 0.37 (0.91)                 | -1.69 (1.32)                |
| More than 12 years          | -0.80 (0.57)     | -0.19 (0.93)                | -0.42 (0.83)                | -0.68 (0.71)                | -1.01 (0.99)                | -3.45 (1.14) **             |
| Unknown                     | -0.37 (1.02)     | -1.24 (1.19)                | -1.93 (1.13)                | -2.08 (0.98) *              | 0.49 (1.27)                 | 1.81 (2.18)                 |
| <b>Childhood health</b>     |                  |                             |                             |                             |                             |                             |
| Poor/Fair                   | Ref.             | Ref.                        | Ref.                        | Ref.                        | Ref.                        | Ref.                        |

|                           |                   |                   |                   |                   |                   |                   |
|---------------------------|-------------------|-------------------|-------------------|-------------------|-------------------|-------------------|
| Good                      | -0.48 (1.05)      | -0.90 (1.09)      | -0.50 (1.13)      | -2.16 (1.23)      | -0.66 (1.53)      | 1.91 (2.18)       |
| Very good                 | -0.50 (0.85)      | -1.66 (1.05)      | -1.19 (1.05)      | -1.22 (1.01)      | -0.22 (1.49)      | 0.23 (1.84)       |
| Excellent                 | -0.01 (0.83)      | -0.75 (1.05)      | -0.34 (1.00)      | -0.65 (1.04)      | -0.23 (1.45)      | 0.74 (1.83)       |
| Region of birth           |                   |                   |                   |                   |                   |                   |
| Northeast                 | -1.02 (0.61)      | -0.64 (0.83)      | -0.40 (0.64)      | -0.60 (0.74)      | -1.29 (1.11)      | -1.65 (1.42)      |
| Midwest                   | -1.03 (0.50) *    | -0.24 (0.74)      | -0.12 (0.72)      | -1.05 (0.68)      | -1.82 (0.71) *    | -1.55 (1.21)      |
| South                     | Ref.              | Ref.              | Ref.              | Ref.              | Ref.              | Ref.              |
| West                      | -0.77 (0.74)      | -0.33 (1.04)      | 0.17 (0.84)       | -0.54 (0.96)      | -0.81 (1.18)      | -0.51 (1.52)      |
| Outside U.S.              | -1.27 (0.67)      | -0.49 (1.24)      | -0.34 (0.85)      | -0.81 (0.72)      | -0.96 (1.03)      | -2.33 (1.64)      |
| Constant                  | 130.18 (1.27) *** | 108.35 (1.69) *** | 116.75 (1.68) *** | 128.62 (1.70) *** | 140.96 (1.71) *** | 156.00 (2.73) *** |
| <hr/>                     |                   |                   |                   |                   |                   |                   |
| Systolic BP at percentile |                   | 105.33            | 114.67            | 126.33            | 138.67            | 152.33            |

*Note.* N=13,965. Standard errors in parentheses. Age is centered at 51 years. BP=Blood pressure, measured in millimeters of mercury (mmHg); OLS=Ordinary least squares; Ref=Reference; UQR=Unconditional quantile regression. Two-sided significance tests: \*\*\*  $P < .001$ ; \*\*  $P < .01$ ; \*  $P < .05$

**Table 9.** Coefficients and standard errors from OLS linear regression and UQR models of systolic BP, adjusting for potential early-life confounders and adult socioeconomic and health-related covariates

|                             | OLS              | UQR                         |                             |                             |                             |                             |
|-----------------------------|------------------|-----------------------------|-----------------------------|-----------------------------|-----------------------------|-----------------------------|
|                             | Mean             | 10 <sup>th</sup> percentile | 25 <sup>th</sup> percentile | 50 <sup>th</sup> percentile | 75 <sup>th</sup> percentile | 90 <sup>th</sup> percentile |
| <b>Education</b>            |                  |                             |                             |                             |                             |                             |
| Less than high school       | Ref.             | Ref.                        | Ref.                        | Ref.                        | Ref.                        | Ref.                        |
| High school or GED          | -1.55 (0.67) *   | -2.15 (0.73) **             | -1.91 (0.71) **             | -0.77 (0.73)                | -1.16 (1.02)                | -3.52 (1.63) *              |
| Associate's or some college | -2.82 (0.71) *** | -2.39 (0.90) *              | -2.77 (0.79) **             | -1.96 (0.79) *              | -3.07 (1.11) **             | -4.49 (1.66) **             |
| Bachelor's or higher        | -4.25 (0.82) *** | -3.39 (1.04) **             | -4.84 (0.99) ***            | -4.13 (0.95) ***            | -3.79 (1.17) **             | -6.17 (1.56) ***            |
| Age                         | 0.47 (0.08) ***  | 0.63 (0.12) ***             | 0.57 (0.10) ***             | 0.50 (0.10) ***             | 0.52 (0.11) ***             | 0.30 (0.19)                 |
| Age-squared                 | -0.00 (0.00)     | -0.01 (0.00) **             | -0.01 (0.00) *              | -0.00 (0.00)                | -0.00 (0.00)                | 0.01 (0.01)                 |
| Female                      | -5.49 (0.35) *** | -6.39 (0.59) ***            | -6.44 (0.53) ***            | -6.05 (0.42) ***            | -5.54 (0.52) ***            | -3.45 (0.94) ***            |
| <b>Race/ethnicity</b>       |                  |                             |                             |                             |                             |                             |
| Non-Hispanic White          | Ref.             | Ref.                        | Ref.                        | Ref.                        | Ref.                        | Ref.                        |
| Non-Hispanic Black          | 3.58 (0.69) ***  | 1.93 (0.72) **              | 2.88 (0.71) ***             | 2.78 (0.84) **              | 4.62 (1.15) ***             | 6.55 (1.39) ***             |
| Hispanic                    | 0.32 (0.78)      | -1.04 (1.10)                | 0.13 (0.81)                 | -0.04 (0.86)                | 0.26 (1.08)                 | 1.12 (1.68)                 |
| Other                       | 2.35 (0.95) *    | 0.40 (1.47)                 | 1.89 (1.12)                 | 2.02 (1.06)                 | 2.92 (1.40) *               | 5.09 (2.28) *               |
| <b>Childhood SES</b>        |                  |                             |                             |                             |                             |                             |
| Poor                        | Ref.             | Ref.                        | Ref.                        | Ref.                        | Ref.                        | Ref.                        |
| About average               | 0.07 (0.48)      | 0.74 (0.57)                 | 0.55 (0.51)                 | 0.45 (0.60)                 | -0.96 (0.72)                | 0.03 (1.13)                 |
| Well off                    | -0.00 (0.74)     | -1.58 (1.26)                | 0.21 (0.98)                 | 0.81 (0.91)                 | -0.42 (1.04)                | 1.49 (1.86)                 |
| <b>Mother's education</b>   |                  |                             |                             |                             |                             |                             |
| Up to 8 years               | Ref.             | Ref.                        | Ref.                        | Ref.                        | Ref.                        | Ref.                        |
| 9-11 years                  | 0.55 (0.64)      | 0.13 (0.84)                 | 0.22 (0.67)                 | 0.15 (0.83)                 | 1.59 (1.07)                 | 0.55 (1.53)                 |
| 12 years                    | -0.16 (0.54)     | -0.70 (0.69)                | 0.20 (0.71)                 | -0.37 (0.62)                | 0.49 (0.90)                 | -1.43 (1.29)                |
| More than 12 years          | -0.57 (0.57)     | -0.04 (0.94)                | -0.21 (0.81)                | -0.50 (0.70)                | -0.79 (0.95)                | -3.11 (1.12) **             |
| Unknown                     | -0.42 (1.01)     | -1.02 (1.17)                | -1.70 (1.14)                | -2.04 (0.96) *              | 0.27 (1.28)                 | 1.45 (2.18)                 |
| <b>Childhood health</b>     |                  |                             |                             |                             |                             |                             |
| Poor/Fair                   | Ref.             | Ref.                        | Ref.                        | Ref.                        | Ref.                        | Ref.                        |

|                                     |                  |                 |                 |                 |                 |                 |
|-------------------------------------|------------------|-----------------|-----------------|-----------------|-----------------|-----------------|
| Good                                | -0.79 (1.00)     | -1.46 (1.05)    | -1.09 (1.12)    | -2.52 (1.19) *  | -0.81 (1.48)    | 1.89 (2.09)     |
| Very good                           | -0.82 (0.83)     | -2.32 (1.01) *  | -1.86 (1.06)    | -1.62 (0.98)    | -0.35 (1.47)    | 0.27 (1.81)     |
| Excellent                           | -0.28 (0.8)      | -1.42 (0.99)    | -1.00 (1.00)    | -1.02 (1.04)    | -0.32 (1.44)    | 0.92 (1.81)     |
| Region of birth                     |                  |                 |                 |                 |                 |                 |
| Northeast                           | -1.13 (0.61)     | -0.88 (0.86)    | -0.54 (0.64)    | -0.71 (0.74)    | -1.40 (1.11)    | -1.73 (1.40)    |
| Midwest                             | -1.22 (0.49) *   | -0.51 (0.77)    | -0.38 (0.73)    | -1.22 (0.68)    | -1.99 (0.70) ** | -1.74 (1.18)    |
| South                               | Ref.             | Ref.            | Ref.            | Ref.            | Ref.            | Ref.            |
| West                                | -0.87 (0.74)     | -0.49 (1.09)    | -0.02 (0.81)    | -0.69 (0.95)    | -0.89 (1.15)    | -0.47 (1.52)    |
| Outside U.S.                        | -1.28 (0.66)     | -0.44 (1.23)    | -0.38 (0.84)    | -0.77 (0.73)    | -0.94 (1.03)    | -2.38 (1.64)    |
| Marital status                      |                  |                 |                 |                 |                 |                 |
| Married/Partnered                   | Ref.             | Ref.            | Ref.            | Ref.            | Ref.            | Ref.            |
| Divorced/Separated                  | 0.47 (0.58)      | -0.11 (0.93)    | -0.27 (0.68)    | 0.18 (0.65)     | 1.43 (0.85)     | 1.01 (1.28)     |
| Widowed                             | 1.38 (0.56) *    | 0.28 (0.88)     | 0.98 (0.68)     | 1.21 (0.68)     | 1.20 (0.87)     | 2.46 (1.36)     |
| Never married                       | 0.85 (0.82)      | 1.92 (0.91) *   | 1.22 (0.91)     | 0.42 (1.16)     | 0.25 (1.55)     | 0.57 (1.94)     |
| Total wealth quintile               |                  |                 |                 |                 |                 |                 |
| Q1: Up to \$7,000                   | Ref.             | Ref.            | Ref.            | Ref.            | Ref.            | Ref.            |
| Q2: \$7,001 – 85,600                | -1.10 (0.56)     | -0.47 (0.84)    | -1.36 (0.75)    | -0.39 (0.81)    | -1.09 (0.86)    | -1.46 (1.43)    |
| Q3: \$85,601 – 226,000              | -1.25 (0.74)     | -1.23 (0.89)    | -0.79 (0.84)    | -0.97 (0.88)    | -0.59 (1.19)    | -1.52 (1.65)    |
| Q4: \$226,001 – 598,900             | -2.38 (0.64) *** | -1.67 (1.09)    | -1.80 (0.81) *  | -1.47 (0.80)    | -2.91 (1.24) *  | -2.51 (1.75)    |
| Q5: More than \$598,900             | -1.98 (0.83) *   | -1.78 (1.13)    | -1.46 (0.85)    | -1.36 (0.97)    | -1.74 (1.39)    | -2.87 (1.82)    |
| Body mass index (BMI)               | 0.37 (0.03) ***  | 0.49 (0.05) *** | 0.45 (0.04) *** | 0.34 (0.04) *** | 0.31 (0.05) *** | 0.31 (0.07) *** |
| Freq. of vigorous physical activity |                  |                 |                 |                 |                 |                 |
| Never                               | Ref.             | Ref.            | Ref.            | Ref.            | Ref.            | Ref.            |
| Monthly or weekly                   | 0.56 (0.54)      | 1.16 (0.80)     | 1.77 (0.69) *   | 0.18 (0.67)     | 0.51 (0.84)     | -0.44 (1.05)    |
| More than once per week             | -0.45 (0.52)     | 1.19 (0.73)     | 0.16 (0.63)     | -0.23 (0.67)    | -1.04 (0.76)    | -2.36 (1.17) *  |
| N alcoholic drinks per week         | 0.31 (0.04) ***  | 0.26 (0.06) *** | 0.31 (0.04) *** | 0.31 (0.05) *** | 0.37 (0.07) *** | 0.41 (0.10) *** |
| Smoking history                     |                  |                 |                 |                 |                 |                 |
| Never smoked                        | Ref.             | Ref.            | Ref.            | Ref.            | Ref.            | Ref.            |
| Formerly smoked                     | -1.53 (0.42) *** | -0.61 (0.60)    | -1.64 (0.55) ** | -1.17 (0.56) *  | -1.59 (0.69) *  | -2.81 (0.86) ** |

|                                 |                   |                  |                   |                   |                   |                   |
|---------------------------------|-------------------|------------------|-------------------|-------------------|-------------------|-------------------|
| Currently smokes                | 0.84 (0.61)       | 0.40 (0.86)      | -0.50 (0.75)      | 0.25 (0.69)       | 2.23 (1.08) *     | 3.12 (1.67)       |
| Diabetes                        | 1.39 (0.55) *     | 0.42 (0.56)      | 1.10 (0.51) *     | 1.79 (0.51) **    | 1.34 (0.89)       | 1.37 (1.08)       |
| Heart disease                   | -2.32 (0.56) ***  | -2.67 (0.79) **  | -2.35 (0.57) ***  | -2.71 (0.68) ***  | -2.26 (0.71) **   | -2.46 (0.82) **   |
| Stroke                          | 1.48 (0.88)       | -0.34 (0.90)     | 0.22 (0.90)       | 2.24 (0.99) *     | 2.43 (1.25)       | 3.01 (1.92)       |
| Health insurance                |                   |                  |                   |                   |                   |                   |
| Private                         | Ref.              | Ref.             | Ref.              | Ref.              | Ref.              | Ref.              |
| Public                          | -0.35 (0.50)      | -1.35 (0.65) *   | -0.97 (0.48) *    | -0.78 (0.65)      | 0.23 (0.87)       | 0.44 (1.12)       |
| None                            | 0.37 (1.02)       | 0.04 (1.49)      | 0.97 (1.15)       | -0.31 (1.23)      | 0.47 (1.43)       | -0.06 (1.94)      |
| Doctor visits in past two years |                   |                  |                   |                   |                   |                   |
| 0                               | Ref.              | Ref.             | Ref.              | Ref.              | Ref.              | Ref.              |
| 1-5                             | -2.66 (0.94) **   | 0.31 (1.19)      | -0.15 (0.91)      | -1.77 (0.82) *    | -3.57 (1.23) **   | -6.48 (2.12) **   |
| 6-11                            | -3.43 (1.00) **   | -0.51 (1.20)     | -1.12 (0.99)      | -2.47 (1.00) *    | -4.26 (1.23) **   | -6.61 (2.18) **   |
| 12-23                           | -3.85 (0.99) ***  | -0.45 (1.24)     | -0.98 (1.04)      | -2.77 (1.02) **   | -5.71 (1.23) ***  | -7.73 (2.54) **   |
| 24 or more                      | -5.15 (1.14) ***  | -2.21 (1.39)     | -2.41 (1.28)      | -3.74 (1.17) **   | -5.95 (1.41) ***  | -9.67 (2.19) ***  |
| Constant                        | 120.86 (1.84) *** | 93.08 (2.92) *** | 103.51 (2.57) *** | 119.35 (2.32) *** | 133.05 (2.47) *** | 150.75 (4.13) *** |
| Systolic BP at percentile       |                   | 105.33           | 114.67            | 126.33            | 138.67            | 152.33            |

*Note.* N=13,965. Standard errors in parentheses. Age is centered at 51 years. BP=Blood pressure, measured in millimeters of mercury (mmHg); OLS=Ordinary least squares; Ref=Reference; UQR=Unconditional quantile regression. Two-sided significance tests: \*\*\*  $P < .001$ ; \*\*  $P < .01$ ; \*  $P < .05$

**Table 10.** Coefficients and standard errors from OLS linear regression and UQR models of diastolic BP

|                             | OLS              | UQR                         |                             |                             |                             |                             |
|-----------------------------|------------------|-----------------------------|-----------------------------|-----------------------------|-----------------------------|-----------------------------|
|                             | Mean             | 10 <sup>th</sup> percentile | 25 <sup>th</sup> percentile | 50 <sup>th</sup> percentile | 75 <sup>th</sup> percentile | 90 <sup>th</sup> percentile |
| Education                   |                  |                             |                             |                             |                             |                             |
| Less than high school       | Ref.             | Ref.                        | Ref.                        | Ref.                        | Ref.                        | Ref.                        |
| High school or GED          | -0.26 (0.36)     | 0.35 (0.54)                 | 0.07 (0.47)                 | 0.00 (0.35)                 | 0.02 (0.58)                 | -2.43 (1.05) *              |
| Associate's or some college | -0.50 (0.37)     | -0.01 (0.56)                | 0.48 (0.44)                 | -0.27 (0.37)                | 0.37 (0.55)                 | -2.66 (1.06) *              |
| Bachelor's or higher        | -1.64 (0.39) *** | -0.12 (0.47)                | -0.56 (0.46)                | -1.35 (0.42) **             | -1.72 (0.58) **             | -5.16 (1.02) ***            |
| Age                         | -0.21 (0.04) *** | -0.07 (0.07)                | -0.13 (0.06) *              | -0.22 (0.06) ***            | -0.25 (0.06) ***            | -0.36 (0.10) **             |
| Age-squared                 | -0.00 (0.00)     | -0.01 (0.00) *              | -0.00 (0.00) *              | -0.00 (0.00)                | 0.00 (0.00)                 | 0.00 (0.00)                 |
| Female                      | -1.11 (0.22) *** | -0.90 (0.30) **             | -0.98 (0.27) ***            | -1.18 (0.26) ***            | -1.40 (0.37) ***            | -1.28 (0.45) **             |
| Race/ethnicity              |                  |                             |                             |                             |                             |                             |
| Non-Hispanic White          | Ref.             | Ref.                        | Ref.                        | Ref.                        | Ref.                        | Ref.                        |
| Non-Hispanic Black          | 2.47 (0.32) ***  | 1.02 (0.31) **              | 1.23 (0.34) **              | 1.74 (0.38) ***             | 3.03 (0.44) ***             | 4.30 (0.62) ***             |
| Hispanic                    | -0.85 (0.35) *   | -0.27 (0.51)                | -0.86 (0.48)                | -0.62 (0.37)                | -0.61 (0.50)                | -2.86 (0.78) ***            |
| Other                       | 1.36 (0.58) *    | -0.25 (0.65)                | 0.65 (0.66)                 | 1.36 (0.67) *               | 2.09 (0.80) *               | 1.59 (1.16)                 |
| Constant                    | 82.83 (0.47) *** | 68.20 (0.60) ***            | 74.57 (0.54) ***            | 82.23 (0.61) ***            | 89.39 (0.74) ***            | 100.63 (1.20) ***           |
| Diastolic BP at percentile  |                  | 65.00                       | 71.00                       | 78.00                       | 85.33                       | 93.00                       |

*Note.* N=14,498. Standard errors in parentheses. Age is centered at 51 years. BP=Blood pressure, measured in millimeters of mercury (mmHg); OLS=Ordinary least squares; Ref=Reference; UQR=Unconditional quantile regression. Two-sided significance tests: \*\*\*  $P < .001$ ; \*\*  $P < .01$ ; \*  $P < .05$



**Table 11.** Coefficients and standard errors from OLS linear regression and UQR models of systolic BP, measuring education with years of schooling

|                           | OLS               | UQR                         |                             |                             |                             |                             |
|---------------------------|-------------------|-----------------------------|-----------------------------|-----------------------------|-----------------------------|-----------------------------|
|                           | Mean              | 10 <sup>th</sup> percentile | 25 <sup>th</sup> percentile | 50 <sup>th</sup> percentile | 75 <sup>th</sup> percentile | 90 <sup>th</sup> percentile |
| Years of schooling        | -0.74 (0.08) ***  | -0.38 (0.12) **             | -0.60 (0.11) ***            | -0.67 (0.10) ***            | -0.89 (0.11) ***            | -1.27 (0.13) ***            |
| Age                       | 0.35 (0.07) ***   | 0.50 (0.11) ***             | 0.43 (0.10) ***             | 0.39 (0.09) ***             | 0.37 (0.10) ***             | 0.19 (0.17)                 |
| Age-squared               | -0.00 (0.00)      | -0.01 (0.00) **             | -0.01 (0.00)                | -0.00 (0.00)                | 0.00 (0.00)                 | 0.01 (0.01)                 |
| Female                    | -5.92 (0.33) ***  | -6.91 (0.54) ***            | -6.93 (0.45) ***            | -6.37 (0.39) ***            | -6.07 (0.51) ***            | -3.59 (0.83) ***            |
| Race/ethnicity            |                   |                             |                             |                             |                             |                             |
| Non-Hispanic White        | Ref.              | Ref.                        | Ref.                        | Ref.                        | Ref.                        | Ref.                        |
| Non-Hispanic Black        | 5.40 (0.62) ***   | 3.33 (0.66) ***             | 3.73 (0.62) ***             | 3.93 (0.73) ***             | 7.01 (0.97) ***             | 9.82 (1.29) ***             |
| Hispanic                  | 1.02 (0.57)       | 0.00 (0.89)                 | 0.69 (0.69)                 | 0.27 (0.62)                 | 1.00 (0.74)                 | 2.78 (1.38) *               |
| Other                     | 1.98 (0.96) *     | -0.57 (1.67)                | 1.11 (1.08)                 | 1.89 (0.99)                 | 3.13 (1.39) *               | 5.12 (1.97) *               |
| Constant                  | 129.60 (0.77) *** | 106.37 (1.13) ***           | 116.75 (1.11) ***           | 128.17 (1.10) ***           | 140.51 (1.07) ***           | 154.72 (1.66) ***           |
| Systolic BP at percentile |                   | 105.33                      | 114.67                      | 126.33                      | 138.67                      | 152.33                      |

*Note.* N=14,498. Standard errors in parentheses. Years of schooling ranges from 8 or fewer to 17 or more, and is centered at 8. Age is centered at 51 years. BP=Blood pressure, measured in millimeters of mercury (mmHg); NH=Non-Hispanic; OLS=Ordinary least squares; Ref=Reference; UQR=Unconditional quantile regression. Two-sided significance tests: \*\*\*  $P < .001$ ; \*\*  $P < .01$ ; \*  $P < .05$

**Table 12.** Coefficients and standard errors from OLS linear regression and UQR models of systolic BP, among those aged 51-69

|                             | OLS               | UQR                         |                             |                             |                             |                             |
|-----------------------------|-------------------|-----------------------------|-----------------------------|-----------------------------|-----------------------------|-----------------------------|
|                             | Mean              | 10 <sup>th</sup> percentile | 25 <sup>th</sup> percentile | 50 <sup>th</sup> percentile | 75 <sup>th</sup> percentile | 90 <sup>th</sup> percentile |
| Education                   |                   |                             |                             |                             |                             |                             |
| Less than high school       | Ref.              | Ref.                        | Ref.                        | Ref.                        | Ref.                        | Ref.                        |
| High school or GED          | -2.85 (0.89) **   | -3.39 (0.86) ***            | -1.55 (0.81)                | -1.18 (0.89)                | -3.18 (1.26) *              | -6.54 (2.27) **             |
| Associate's or some college | -4.99 (0.89) ***  | -3.61 (0.80) ***            | -2.56 (0.87) **             | -3.12 (0.91) **             | -6.34 (1.39) ***            | -9.10 (2.16) ***            |
| Bachelor's or higher        | -7.34 (0.93) ***  | -4.62 (0.94) ***            | -4.90 (1.02) ***            | -6.02 (0.99) ***            | -8.70 (1.30) ***            | -12.12 (2.00) ***           |
| Age                         | 0.09 (0.19)       | 0.14 (0.28)                 | -0.08 (0.25)                | 0.29 (0.24)                 | -0.19 (0.29)                | 0.11 (0.38)                 |
| Age-squared                 | 0.01 (0.01)       | 0.01 (0.01)                 | 0.02 (0.01)                 | 0.00 (0.01)                 | 0.03 (0.02)                 | 0.02 (0.02)                 |
| Female                      | -8.05 (0.43) ***  | -8.39 (0.62) ***            | -8.12 (0.57) ***            | -8.36 (0.54) ***            | -8.56 (0.65) ***            | -7.39 (0.96) ***            |
| Race/ethnicity              |                   |                             |                             |                             |                             |                             |
| Non-Hispanic White          | Ref.              | Ref.                        | Ref.                        | Ref.                        | Ref.                        | Ref.                        |
| Non-Hispanic Black          | 5.74 (0.80) ***   | 3.16 (0.67) ***             | 3.25 (0.82) ***             | 4.16 (0.97) ***             | 6.82 (1.16) ***             | 9.44 (1.62) ***             |
| Hispanic                    | 0.91 (0.68)       | -0.68 (0.90)                | 0.00 (0.74)                 | 0.64 (0.66)                 | 0.50 (0.93)                 | 3.32 (1.75)                 |
| Other                       | 1.93 (1.06)       | -0.66 (1.75)                | 0.81 (1.28)                 | 1.76 (1.04)                 | 2.94 (1.41) *               | 4.65 (2.49)                 |
| Constant                    | 131.89 (1.16) *** | 110.27 (1.33) ***           | 119.00 (1.52) ***           | 128.82 (1.49) ***           | 144.51 (1.69) ***           | 157.53 (2.62) ***           |
| Systolic BP at percentile   |                   | 104.67                      | 113.33                      | 124.67                      | 137.00                      | 149.67                      |

Note. N=8,917. Standard errors in parentheses. Age is centered at 51 years. BP=Blood pressure, measured in millimeters of mercury (mmHg); OLS=Ordinary least squares; Ref=Reference; UQR=Unconditional quantile regression. Two-sided significance tests: \*\*\*  $P < .001$ ; \*\*  $P < .01$ ; \*  $P < .05$

**Figure 1.** Kernel density plots of systolic BP by education

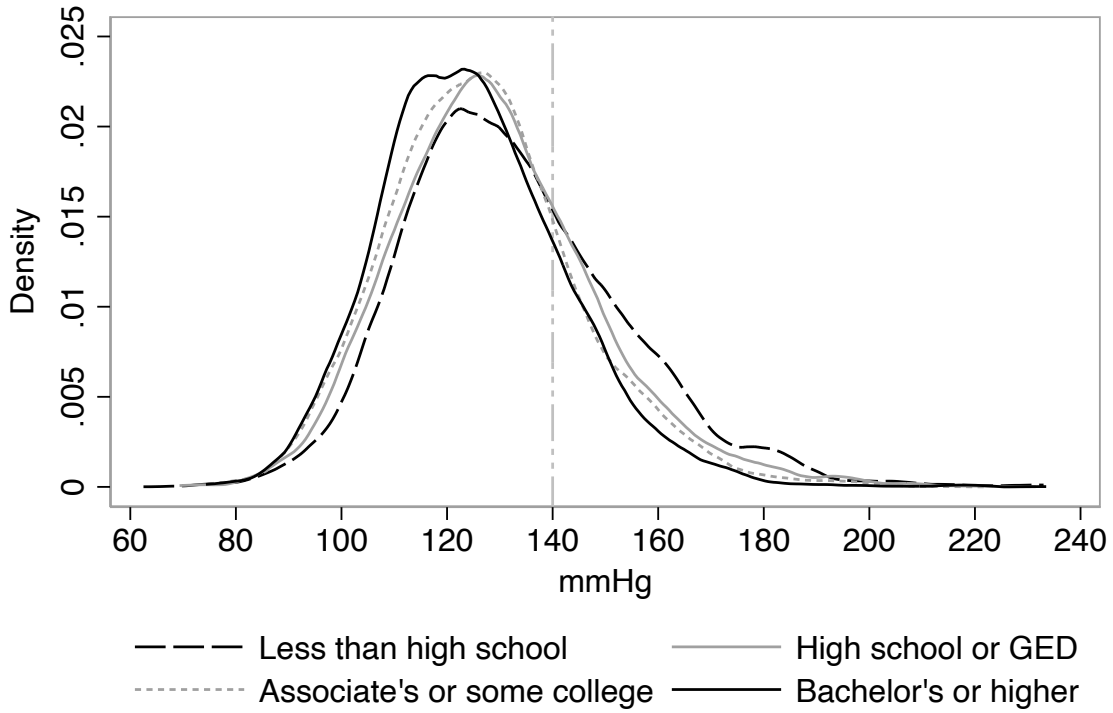

*Note.* N=14,498. BP=Blood pressure, measured in millimeters of mercury (mmHg). The dashed vertical line indicates the recommended systolic BP threshold for hypertension when respondents were surveyed (140 mmHg) (Chobanian et al., 2003).

## REFERENCES

Chobanian, A. V., Bakris, G. L., Black, H. R., Cushman, W. C., Green, L. A., Izzo, J. L., Jones, D. W., Materson, B. J., Oparil, S., Wright, J. T., Roccella, E. J., Joint National Committee on Prevention, Detection, Evaluation, and Treatment of High Blood Pressure. National Heart, Lung, and Blood Institute, & National High Blood Pressure Education Program Coordinating Committee. (2003). Seventh report of the Joint National Committee on Prevention, Detection, Evaluation, and Treatment of High Blood Pressure. *Hypertension*, 42(6), 1206–1252. <https://doi.org/10.1161/01.HYP.0000107251.49515.c2>
